# Supplementary material for: Elucidation of copper environment in a Cu–Cr–Fe oxide catalyst through in situ high-resolution XANES investigation
Source: Royal Society of Chemistry journal article supplement (doi:10.1039/d0cp06468h), 2021-01-01
Supplement: d0cp06468h1.pdf [file d0cp06468h1.pdf]

## Supporting Information

### Elucidation of Copper Environment in a Cu-Cr-Fe Oxide Catalyst Through *in situ* High-Resolution XANES Investigation

Tahmin Lais<sup>1</sup>, Liliana Lukashuk<sup>2</sup>, Leon van de Water<sup>2</sup>, Timothy I. Hyde<sup>3</sup>, Matteo Aramini<sup>4</sup>,  
Gopinathan Sankar <sup>1\*</sup>

1. Department of Chemistry, University College London, 20 Gordon Street, London WC1H 0AJ, United Kingdom

2. Johnson Matthey, PO Box 1, Belasis Avenue, Billingham, Cleveland, TS23 1LB, United Kingdom

3. Johnson Matthey, Blounts Court, Sonning Common, Reading, RG4 9NH, United Kingdom

4. Diamond Light Source, Harwell Science & Innovation Campus, Didcot, Oxfordshire OX11 0DE, United Kingdom

\* Corresponding author. E-mail: g.sankar@ucl.ac.uk

### Contents

**Figure S1.** Example Cu K-edge pre-edge peak fitting of the *in situ* heat treated catalyst at 773 K.

**Figure S2.** Raman spectra of Cu-Cr-Fe oxide catalyst

**Figure S3.** Cu K-edge XANES difference spectra of these systems with respect to starting material of the Cu-Cr-Fe oxide catalyst, measured *in situ* at various temperatures and the *ex situ* thermally heated sample, same as the one investigated with XRD, Raman and XPS.

**Table S1.** The pre-edge energy, its peak area and edge position in energy extracted from XANES data of all the reference compounds, *ex situ* and *in situ* samples are listed.

**Figure S4:** The Cu K-edge XANES of physically combined  $\text{Cu}_2\text{O}:\text{CuO}$ .

**Figure S5.** Typical Cu K-edge EXAFS data and associated Fourier transforms collected *in situ* at RT and 773 K are shown here to illustrate the quality of EXAFS and the best fit obtained from the analysis. The data were analysed between 2.7 and 10  $\text{\AA}^{-1}$  in k-space and fitting range was limited to 0.7 and 2.4  $\text{\AA}$  in R-space.

**Figure S6.** Comparison of the *ex situ* calcined samples at 773 K and linear combination of tetrahedral and octahedrally coordinated compounds.

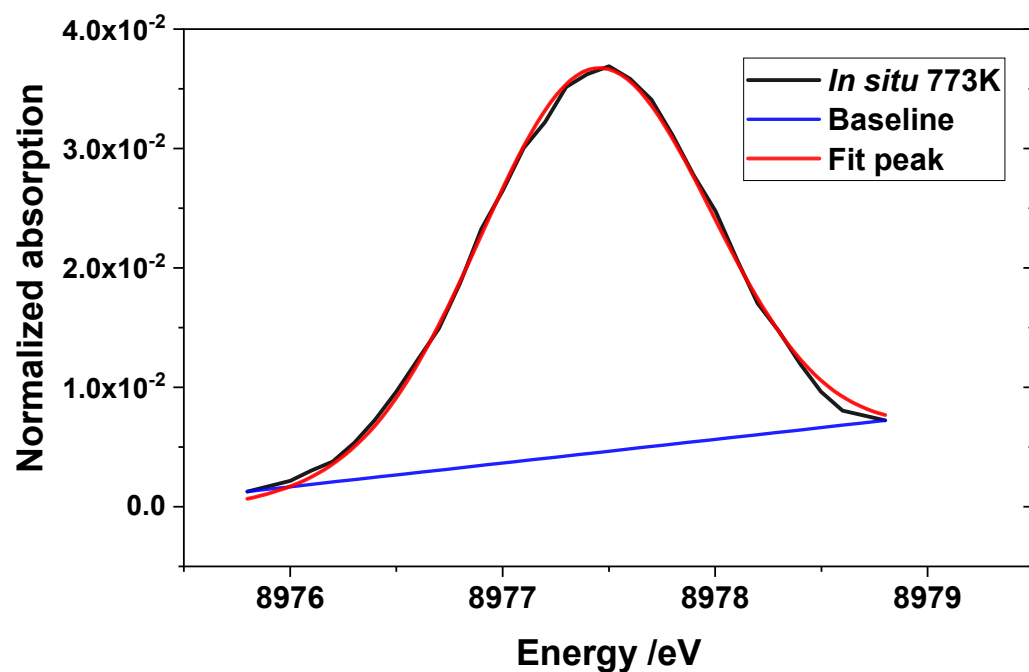

**Figure S1.** An example of the Cu K-edge pre-edge peak fitting is shown for the *in situ* heated materials at 773 K.

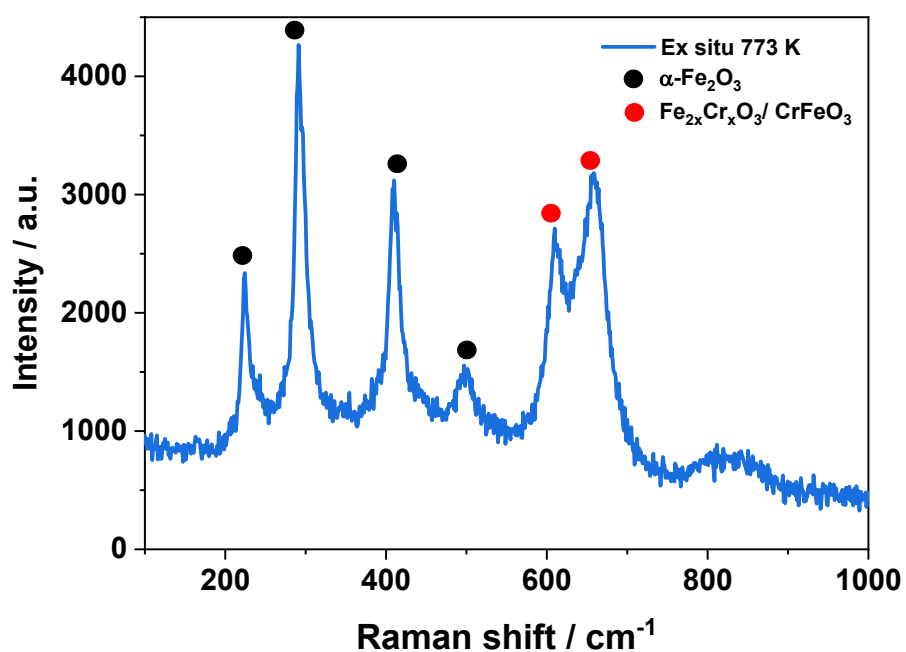

**Figure S2.** Raman spectrum of Cu-Cr-Fe oxide *ex situ* calcined catalyst at 773 K.

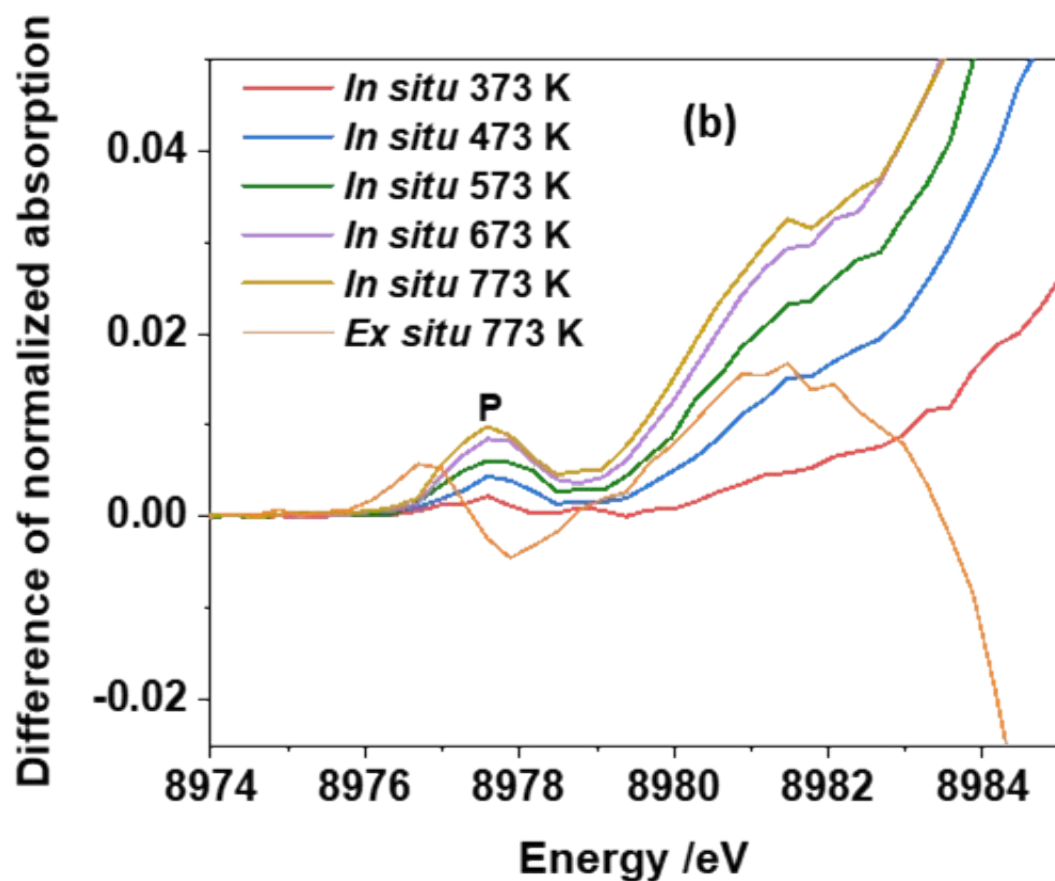

**Figure S3.** Cu K-edge XANES difference spectra of these systems with respect to starting material of the Cu-Cr-Fe oxide catalyst, measured *in situ* at various temperatures and an *ex situ* thermally heated sample, same as the one investigated with XRD, Raman and XPS.

**Table S1.** The pre-edge energy, its peak area and edge position in energy extracted from XANES data of all the reference compounds, *ex situ* and *in situ* samples are listed.

| Sample                           | Pre-edge peak position (eV) | Pre-edge area | Edge energy (eV) +/- 0.1 eV |
|----------------------------------|-----------------------------|---------------|-----------------------------|
| As prepared material             | 8977.40                     | 0.0349        | 8986.5                      |
| <i>In situ</i> 373K              | 8977.40                     | 0.0357        | 8986.5                      |
| <i>In situ</i> 473K              | 8977.42                     | 0.0403        | 8986.4                      |
| <i>In situ</i> 573K              | 8977.43                     | 0.0424        | 8986.3                      |
| <i>In situ</i> 673K              | 8977.45                     | 0.0435        | 8986.1                      |
| <i>In situ</i> 773K              | 8977.44                     | 0.0448        | 8986.1                      |
| <i>Ex situ</i> 773K              | 8977.22                     | 0.0358        | 8987.2                      |
| Cu foil                          | -                           | -             | 8979.1                      |
| Cu <sub>2</sub> O                | -                           | -             | 8980.5                      |
| CuO                              | 8977.80                     | 0.0299        | 8984.5                      |
| Cu(OH) <sub>2</sub>              | 8977.49                     | 0.0353        | 8986.1                      |
| CuFe <sub>2</sub> O <sub>4</sub> | 8977.40                     | 0.0290        | 8987.0                      |
| CuCr <sub>2</sub> O <sub>4</sub> | 8976.81                     | 0.0975        | 8986.7                      |

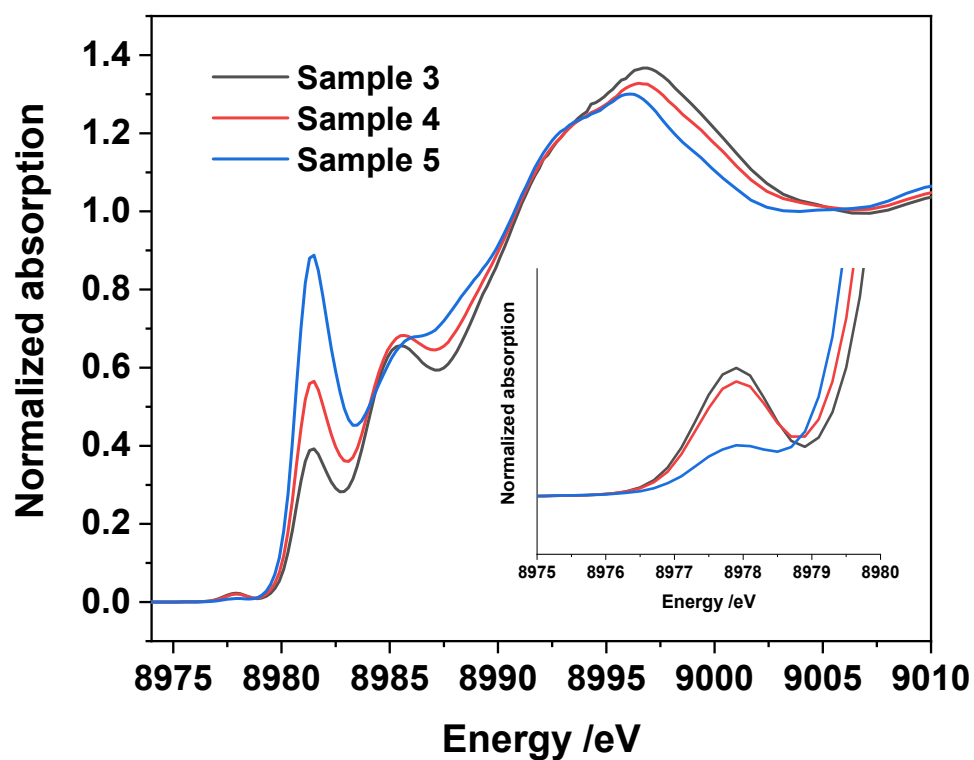

**Figure S4.** The Cu K-edge XANES of physically combined  $\text{Cu}_2\text{O}:\text{CuO}$ , where sample 3 is  $\text{Cu}^{1+}:\text{Cu}^{2+} = 28:72$ , sample 4 is  $54:46$ , and sample 5 is  $76:24$  by weight.

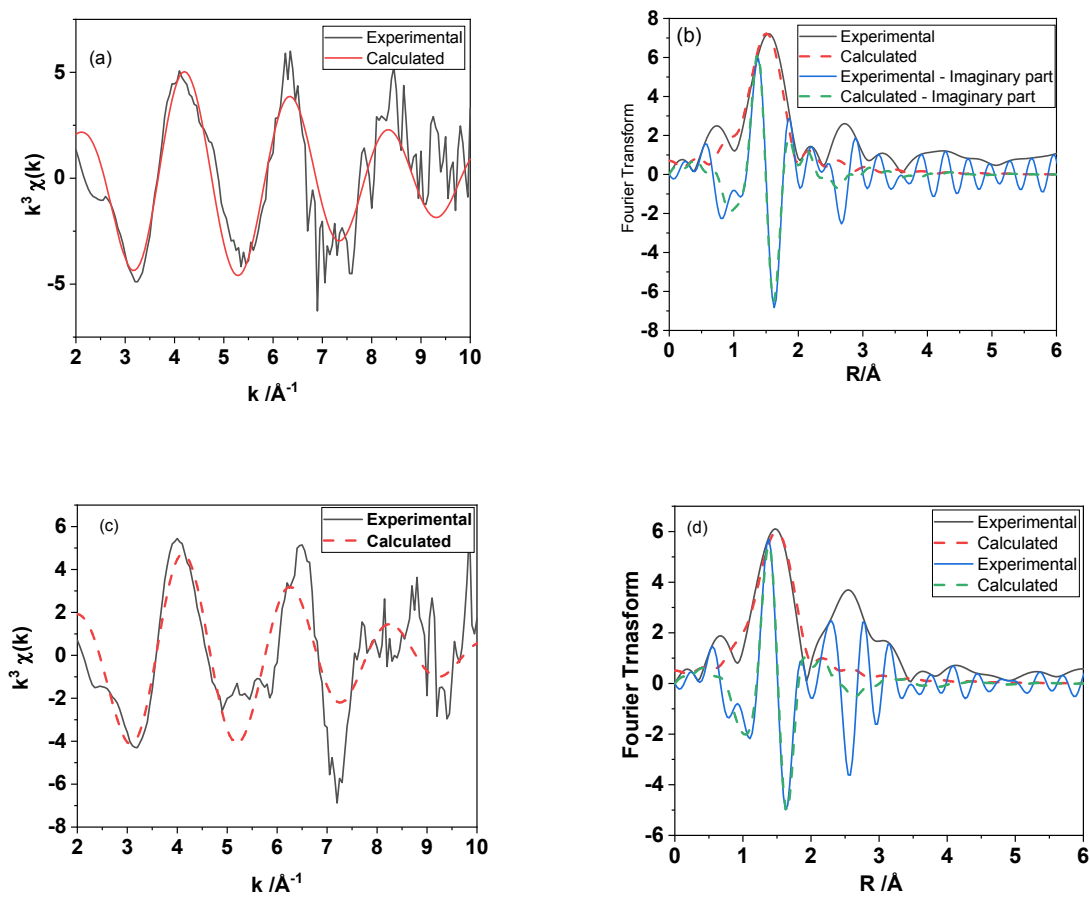

**Figure S5.** Typical Cu K-edge EXAFS data and associated Fourier transforms collected *in situ* at RT and 773 K are shown here to illustrate the quality of EXAFS and the best fit obtained from the analysis. The data were analysed between 2.7 and 10  $\text{\AA}^{-1}$  in k-space and fitting range was limited to 0.7 and 2.4  $\text{\AA}$  in R-space.

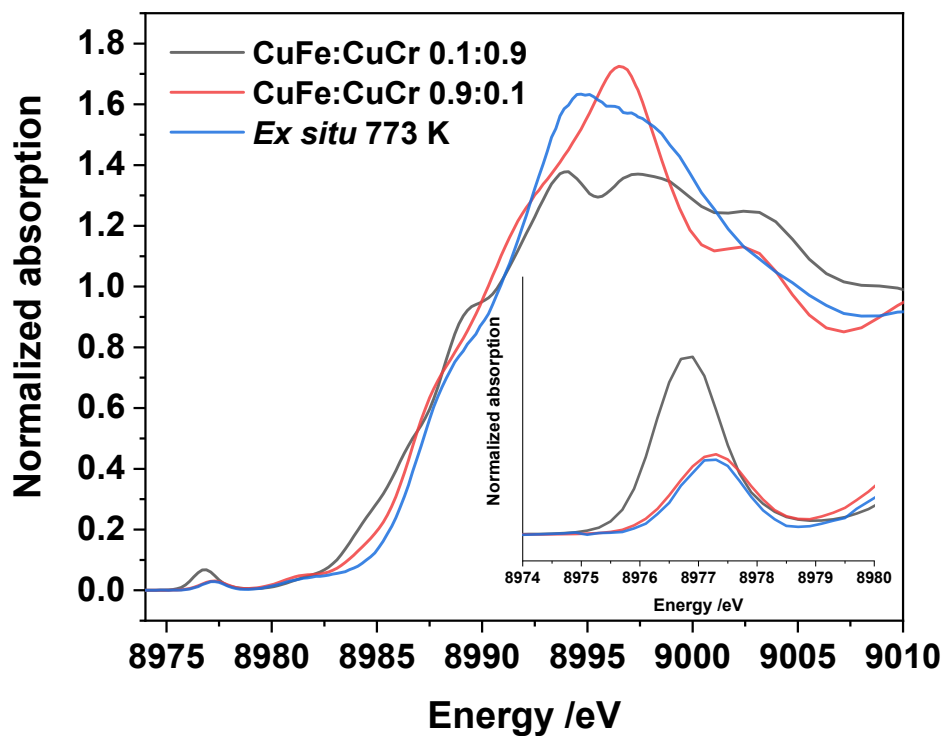

**Figure S6.** Comparison of the *ex situ* calcined samples at 773 K and linear combination of tetrahedral and octahedrally coordinated compounds are shown here. Although pre-edge intensity and position of the calcined materials are similar to the 10% tetrahedrally coordinated copper mixed with 90% of octahedral compound, it is clear the white line intensity of the calcined material at 773 K is distinctly different.
